# Supplementary material for: Effects of Copper Pollution on the Phenolic Compound Content, Color, and Antioxidant Activity of Wine
Source: PubMed Central journal article supplement (PMC6154001; doi:10.3390/molecules22050726), 2017-05-03
Supplement: molecules-22-00726-s001.pdf [file molecules-22-00726-s001.pdf]

# Supplementary Materials: Effects of Copper Pollution on the Phenolic Compound Content, Color, and Antioxidant Activity of Wine

Xiangyu Sun, Tingting Ma, Luyang Han, Weidong Huang and Jicheng Zhan

**Table S1.** Sulfur dioxide (SO<sub>2</sub>) contents in initial juice and in finished wine.

| Sample        |                     | SO <sub>2</sub> Content (mg/L) |
|---------------|---------------------|--------------------------------|
| Initial juice |                     | 20 ± 0.00 a                    |
| Finished wine |                     |                                |
| <i>Low</i>    | 0.00 mM (0 mg/L)    | 1.01 ± 0.11 b                  |
|               | 0.05 mM (3.2 mg/L)  | 1.05 ± 0.06 b                  |
|               | 0.15 mM (9.6 mg/L)  | 1.06 ± 0.11 b                  |
| <i>Medium</i> | 0.20 mM (12.8 mg/L) | 1.07 ± 0.12 b                  |
|               | 0.25 mM (16.0 mg/L) | 1.11 ± 0.12 b                  |
|               | 0.30 mM (19.2 mg/L) | 1.09 ± 0.13 b                  |
|               | 0.35 mM (22.4 mg/L) | 1.06 ± 0.12 b                  |
| <i>High</i>   | 0.50 mM (32 mg/L)   | 0.98 ± 0.09 b                  |
|               | 1.00 mM (64 mg/L)   | 1.01 ± 0.03 b                  |
|               | 1.50 mM (96 mg/L)   | 0.92 ± 0.14 b                  |

**Table S2.** Detection wavelength, retention time, regression equation and limit of detection of eleven phenolic acid compounds.

| Phenolic Compounds             | Detection Wavelength $\lambda$ /nm | Retention Time t/min | Linear Range w/(mg/L) | Regression Equation   | R <sup>2</sup> | Limit of Detection q/(mg/L) |
|--------------------------------|------------------------------------|----------------------|-----------------------|-----------------------|----------------|-----------------------------|
| gallic acid                    | 280                                | 4.904                | 1–150                 | y = 65,231x – 18,205  | 0.9995         | 0.0252                      |
| protocatechuic acid            | 280                                | 9.332                | 1.4–140               | y = 73,473x – 32,526  | 0.9993         | 0.6546                      |
| gentisic acid                  | 320                                | 13.743               | 1.5–100               | y = 152,346x – 76,574 | 0.9998         | 0.2145                      |
| <i>p</i> -hydroxy benzoic acid | 280                                | 15.788               | 0.5–100               | y = 36,453x – 13,256  | 0.9998         | 0.0643                      |
| chlorogenic acid               | 280                                | 20.102               | 0.5–100               | y = 274,682x – 76,543 | 0.9999         | 0.0155                      |
| vanillic acid                  | 280                                | 21.508               | 1–100                 | y = 154,654x – 63,263 | 0.9992         | 0.0145                      |
| caffeic acid                   | 280                                | 22.656               | 1–100                 | y = 117,543x – 16,473 | 0.9997         | 0.2261                      |
| syringic acid                  | 280                                | 26.358               | 0.5–50                | y = 86,234x – 65,546  | 0.9998         | 0.0462                      |
| <i>p</i> -coumaric acid        | 280                                | 33.232               | 0.5–50                | y = 153,435x – 34,511 | 0.9998         | 0.0154                      |
| ferulic acid                   | 280                                | 36.714               | 0.5–50                | y = 765,425x – 65,342 | 0.9995         | 0.0233                      |
| sinapic acid                   | 280                                | 37.792               | 0.5–50                | y = 91,543x – 65,432  | 0.9997         | 0.0235                      |

**Table S3.** Detection wavelength, retention time, regression equation and limit of detection of five flavan-3-ol compounds.

| Phenolic Compounds      | Detection Wavelength $\lambda$ /nm | Retention Time t/min | Linear Range w/(mg/L) | Regression Equation   | R <sup>2</sup> | Limit of Detection q/(mg/L) |
|-------------------------|------------------------------------|----------------------|-----------------------|-----------------------|----------------|-----------------------------|
| (+)-Catechin            | 280                                | 22.866               | 1–100                 | y = 124,945x – 16,335 | 0.9993         | 0.0726                      |
| (-)-Epigallocatechin    | 280                                | 23.823               | 1–100                 | y = 163,433x – 42,695 | 0.9998         | 0.0423                      |
| EGCG                    | 280                                | 31.611               | 1–100                 | y = 154,366x – 43,266 | 0.9998         | 0.1355                      |
| (-)-Epicatechin         | 280                                | 35.925               | 1–100                 | y = 436,241x – 15,345 | 0.9999         | 0.0255                      |
| (-)-Epicatechin gallate | 280                                | 50.913               | 1–100                 | y = 515,634x – 43,624 | 0.9997         | 0.0632                      |

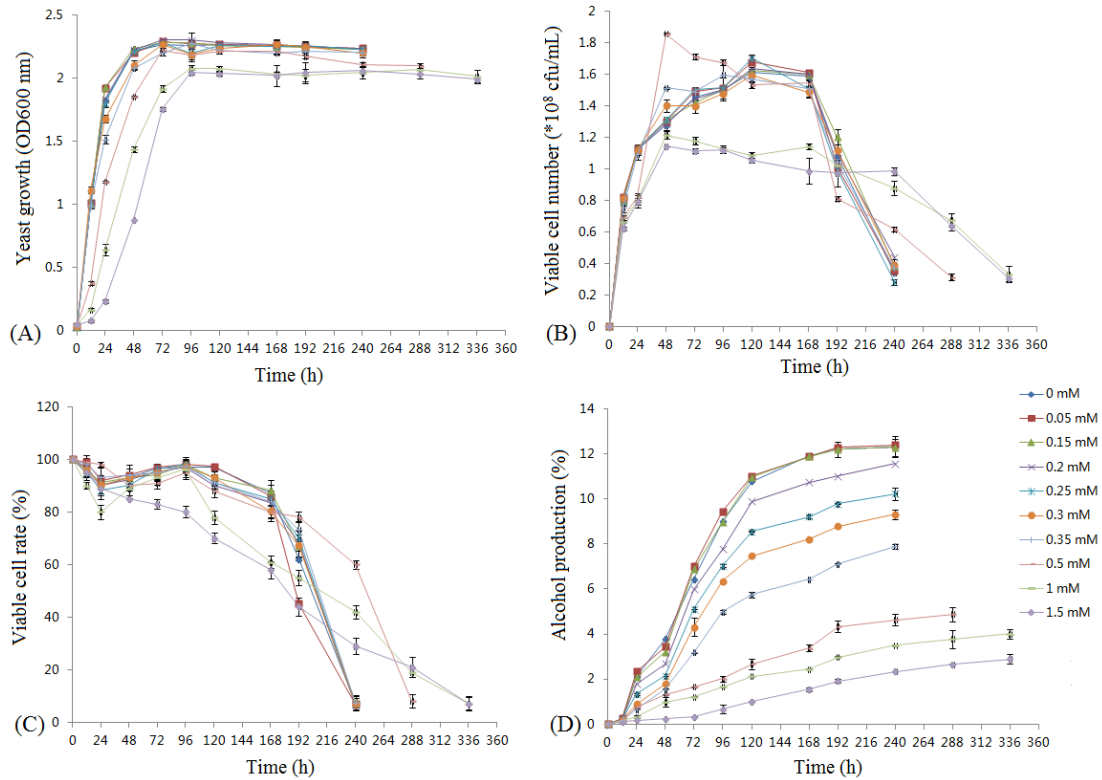

**Figure S1.** Yeast growth (A), viable cell number (B), viable cell rate (C), and alcohol production (D).

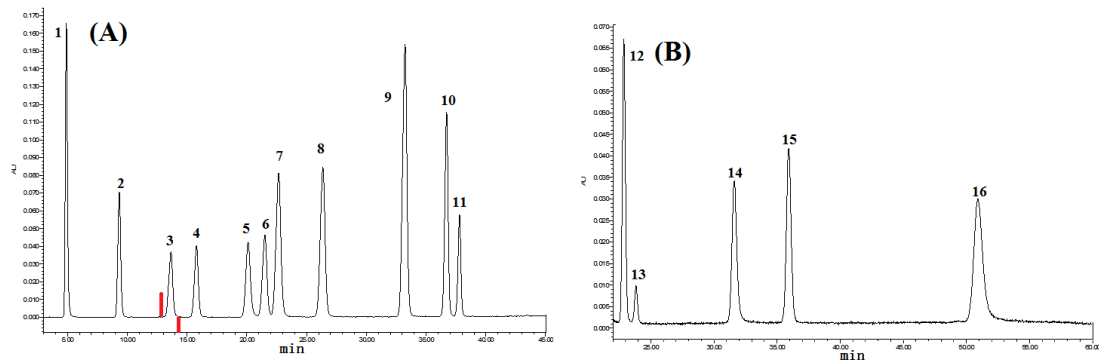

**Figure S2.** HPLC chromatographs of 11 phenolic acids (A) (gentisic acid was detected at 320 nm (the red markers), the others at 280 nm) and (B) 5 flavan-3-ol standards (280 nm). 1, gallic acid; 2, protocatechuic acid; 3, gentisic acid (320 nm); 4, *p*-hydroxybenzoic acid; 5, chlorogenic acid; 6, vanillic acid; 7, caffeic acid; 8, syringic acid; 9, *p*-coumaric acid; 10, ferulic acid; 11, sinapic acid; 12, (+)-catechin; 13, (-)-epigallocatechin; 14, (-)-epigallocatechin gallate; 15, (-)-epicatechin and 16, (-)-epicatechin gallate.
